# Supplementary material for: Cell-free protein synthesis with technical additives – expanding the parameter space of in vitro gene expression
Source: Beilstein J Org Chem. 2024 Sep 4;20:2242–53. doi: 10.3762/bjoc.20.192 (PMC11403795; doi:10.3762/bjoc.20.192)
Supplement: File 1 — Calculations of viscosity, macromolecules, inorganic ions, osmolarity and water content for CFPS in Table 1. [file Beilstein_J_Org_Chem-20-2242-s001.xlsx]

## Sheet: Osmolarity + Water content
CFPS solution according to Rolf et al. 2020 [1]					Additional information and conversion in needed units					Calculations for water content					Calculations for Osmolarity of components w/o extract
		Component	standard		different unit		molecular weight pure component			concentration in CFPS		Ratio in CFPS at water density = 997 g/L			n=number of dissociated particles	Osmolarity
Buffer		Mg-glutamate	10	mM			169.42	g/mol		1694.2	mg/L	0.16993	%		2	20	mosmol/L
		K-glutamate	130	mM			185.22	g/mol		24078.6	mg/L	2.41511	%		2	260	mosmol/L
	19x	amino acids (each, expect for leucine)	1.5	mM			110	average g/mol		165	mg/L	0.314443	%		1	28.5	mosmol/L
		Leucine	1.25	mM			131.17	g/mol		163.962	mg/L	0.0164456	%		1	1.25	mosmol/L
		Buffer (HEPES)	50	mM			238.31	g/mol		11915.5	mg/L	1.19514	%		1	50	mosmol/L
	Energy Solution	ATP	1.5	mM			507.18	g/mol		760.77	mg/L	0.0763059	%		1	1.5	mosmol/L
		GTP	1.5	mM			523.18	g/mol		784.77	mg/L	0.0787131	%		1	1.5	mosmol/L
		CTP	0.9	mM			483.16	g/mol		434.844	mg/L	0.0436152	%		1	0.9	mosmol/L
		UTP	0.9	mM			484.14	g/mol		435.726	mg/L	0.0437037	%		1	0.9	mosmol/L
		tRNA	0.2	mg/mL	0.00769231	mM	26	kDa	[2]	200	mg/L	0.0200602	%		1	0.00769231	mosmol/L
		CoA	0.26	mM			767.5	g/mol		199.55	mg/L	0.020015	%		1	0.26	mosmol/L
		NAD	0.33	mM			664.4	g/mol		219.252	mg/L	0.0219912	%		1	0.33	mosmol/L
		cAMP	0.75	mM			329.21	g/mol		246.907	mg/L	0.024765	%		1	0.75	mosmol/L
		folinic acid	0.068	mM			473.4	g/mol		32.1912	mg/L	0.00322881	%		1	0.068	mosmol/L
		spermidine	1	mM			145.25	g/mol		145.25	mg/L	0.0145687	%		1	1	mosmol/L
		PGA	30	mM			186.06	g/mol		5581.8	mg/L	0.55986	%		1	30	mosmol/L
		PEG-8000	2	%	2.5	mM	8000	g/mol		20000	mg/L	2.00602	%		1	2.5	mosmol/L
DNA		Plasmid concentration	1	nM	0.003627	mg/mL				3.627	mg/L	0.000363791	%		1	1e-06	mosmol/L
cell-free E. coli extract		Protein concentration ~	10	mg/mL	0.25	mM	40	kDa	[3]	10000	mg/L	1.00301	%		1	0.25	mosmol/L
reaction conditions		scale	20	µL					Ratio of non-water components in CFPS:			8.02728	%		Osmolarity without proteins:	399.466	mosmol/L
		temperature	37	°C					Water content in CFPS:			91.9727	%		Osmolarity in CFPS	404.857		mosmol/L
		reaction time	4	h
		pH ~	8
References:
[1]	Rolf, J.; Siedentop, R.; Lütz, S.; Rosenthal, K. Int J Mol Sci 2020, 21. doi:10.3390/ijms21010105
[2]	https://bionumbers.hms.harvard.edu/bionumber.aspx?s=n&v=1&id=110969 (acessed 9th of Feburary 2024)
[3]	https://bionumbers.hms.harvard.edu/bionumber.aspx?id=105861&ver=4 (acessed 9th of Feburary 2024)

## Sheet: Macromolecules
	general value					comment/reference
Range of macromolecules in E. coli:			lower limit=300 g/L	upper limit=500 g/L		[1]
Volume cultivation	500	mL
Average OD600 at harvest	4.13
number of cells	1652000000000					according to [2]
sum volume of cells	0.0072688					Volume E.coli single cell in LB: 4.4+/-1.1 µm3 [3]
Macromolecules			2.18064	3.6344	g
Average cell wet weight	3.57	g
Volume buffer (1mL/g CWW)	0.00357	L
macromolecule concentration			610.824	1018.04	g/L
dilution in CFPS			146.598	244.329	g/L
including added macromolecules			166.801	264.533	g/L	+ PEG-8000, tRNA, plasmid
References:
[1]	Theillet, F. X.; Binolfi, A.; Frembgen-Kesner, T.; Hingorani, K.; Sarkar, M.; Kyne, C.; Li, C.; Crowley, P. B.; Gierasch, L.; Pielak, G. J.; Elcock, A. H.; Gershenson, A.; Selenko, P. Physicochemical Properties of Cells and Their Effects on Intrinsically Disordered Proteins (IDPs). Chemical Reviews. American Chemical Society July 9, 2014, pp 6661–6714. doi:10.1021/cr400695p
[2]	https://www.agilent.com/store/biocalculators/calcODBacterial.jsp?_requestid=1946121 (acessed 9th of Feburary 2024)
[3]	Volkmer, B.; Heinemann, M. PLoS One 2011, 6, 1–6. doi:10.1371/journal.pone.0023126

## Sheet: Properties CFPS + Cell
Additive	PEG-8000							Methylcellulose (15 cP)								Carboxymethylcellulose								Choline Chloride + Urea (1:2)						Choline Chloride + Glycerol (1:2)						Betaine + Ethylene Glycol (1:3)
Concentration [%]	2 = standard CFPS			5		10		0.5		0.75		1		2		0.5		0.75		1		2		2		5		10		2		5		10		2		5		10
Parameter	value/lower limit	upper limit	comment/reference	value/lower limit	upper limit	value/lower limit	upper limit	value/lower limit	upper limit	value/lower limit	upper limit	value/lower limit	upper limit	value/lower limit	upper limit	value/lower limit	upper limit	value/lower limit	upper limit	value/lower limit	upper limit	value/lower limit	upper limit	value/lower limit	upper limit	value/lower limit	upper limit	value/lower limit	upper limit	value/lower limit	upper limit	value/lower limit	upper limit	value/lower limit	upper limit	value/lower limit	upper limit	value/lower limit	upper limit	value/lower limit	upper limit
Viscosity [mPa*s]	1.4		PEG in pure water [1]	2.2085		8.9		3.5		4.68722		6		12	18	17.8125		71.25		142.5		1140		1.44975		1.53089		1.6864		1.43155		1.48231		1.5774		1.4299		1.47777		1.56667
Macromolecules [g/L]	166.801	264.533	macromolecules in extrat + PEG-8000, tRNA, plasmid	196.801	294.533	246.801	344.533	171.801	269.533	174.301	272.033	176.801	274.533	186.801	284.533	171.801	269.533	174.301	272.033	176.801	274.533	186.801	284.533	166.801	264.533	166.801	264.533	166.801	264.533	166.801	264.533	166.801	264.533	166.801	264.533	166.801	264.533	166.801	264.533	166.801	264.533
Inorganic ions [mM]	140		sum of Mg-glutamate and K-glutamate	140		140		140		140		140		140		140		140		140		140		232.4		371		602		214.118		325.295		510.59		140		140		140
Osmolarity [mosM]	404.857			404.857		404.857		404.857		404.857		404.857		404.857		404.857		404.857		404.857		404.857		589.658		866.858		1328.86		553.093		775.447		1146.04		404.857		404.857		404.857
Water content [%]	91.9727		100% - substances in CFPS	88.9727		83.9727		91.4727		91.2227		90.9727		89.9727		91.4727		91.2227		90.9727		89.9727		89.9727		86.9727		81.9727		89.9727		86.9727		81.9727		89.9727		86.9727		81.9727
Viscosity of PEG-8000/water mixtures according to Syal et al. 2005									Viscosity of methylcellulose (15 cP)/water mixtures according to Pijper 1947								Viscosity of carboxymethylcellulose/water mixtures
% w/w	viscosity [mPa*s]								% w/w	viscosity [mPa*s]							Rule of thumb according to Adden et al. 2021: doubling the concentration increases viscosity by a factor 7-9
0	0.8903								0.25	2.5							--> Mean value:	8
0.5	0.9976								0.5	3.5							% w/w	viscosity [mPa*s]
1	1.1412								1	6							2	1140
1.5	1.2732								1.25	7.5							1	142.5
2	1.4059								1.5	9.5							0.75	71.25
3	1.6821								2	15							0.5	17.8125
5	2.2085								2.5	24
									3	37
									3.5	54
									4	80
									4.5	113
									5	160
									0.75	4.68722
	density [g/mL]	molecular weight [g/mol]	Viscosity[mPa*s]	mol/mL	98	95	90	% v/v			References:
2%PEG-8000	1.0007		1.4059	2.5e-06	0.00025	0.00025	0.00025	mol	in 100 mL		[1]	Syal, V. K.; Chauhan, A.; Chauhan, S. Ultrasonic Velocity, Viscosity and Density Studies of Poly (Ethylene Glycols)(PEG-8,000, PEG-20,000) in Acetonitrile (AN) and Water (H 2 O) Mixtures at 25 0 C; 2005; Vol. 27
Reference	[1]		[1]								[2]	Yadav, A.; Pandey, S. J Chem Eng Data 2014, 59, 2221–2229. doi:10.1021/je5001796
H2O in 2%	0.9807	[g]	98.3651	[mL]	96.3651	93.3651	88.3651	mL			[3]	Stefanovic, R.; Ludwig, M.; Webber, G. B.; Atkin, R.; Page, A. J. Physical Chemistry Chemical Physics 2017, 19, 3297–3306. doi:10.1039/c6cp07932f
H2O	0.997	18.0153		0.0553418							[4]	Mulia, K.; Adam, D.; Zahrina, I.; Krisanti, E. A. International Journal of Technology 2018, No. 2, 335–344
H2O in 100 mL					5.33302	5.167	4.89029	mol			[5]	Kučan, K. Z.; Perković, M.; Cmrk, K.; Načinović, D.; Rogošić, M. ChemistrySelect 2018, 3, 12582–12590. doi:10.1002/slct.201803251
CFPS	1.0007		1.4059		5.33327	5.16725	4.89054	mol
ChCl+Urea (1:2)	1.2	86.58	1200	0.01386	0.02772	0.0693001	0.1386	mol	in 100 mL
Reference	at 20 °C [2]		estimated from diagramm in [3]
Choline Chloride		139.63			92.4001	231	462	mM
Total					5.36099	5.23655	5.02914	mol
molar fraction CFPS					0.994829	0.986766	0.972441
molar fraction ChCl+U					0.00517069	0.0132339	0.0275594
ChCl+Glycerol (1:2)	1.2	107.936	300	0.0111177	0.0222354	0.0555885	0.111177	mol	in 100 mL
Reference	at 20 °C (density same as ChCl+Urea [3])		estimated from diagramm in [3]
Choline Chloride		139.63			74.118	185.295	370.59	mM
Total					5.35551	5.22284	5.00171	mol
molar fraction CFPS					0.995848	0.989357	0.977772
molar fraction ChCl+Glyc					0.00415187	0.0106434	0.0222278
B+EG (1:3)	1.12	75.84	64.9628	0.0147679	0.0295359	0.0738397	0.147679	mol	in 100 mL
Reference	[4]		[5]
Betaine		117.15			73.8397	184.599	369.198	mM
Total					5.36281	5.24109	5.03822	mol
molar fraction CFPS					0.994492	0.985911	0.970688
molar fraction B+EG					0.00550754	0.0140886	0.0293118
