# Supplementary material for: Cell-free protein synthesis with technical additives – expanding the parameter space of in vitro gene expression
Source: Beilstein J Org Chem. 2024 Sep 4;20:2242–53. doi: 10.3762/bjoc.20.192 (PMC11403795; doi:10.3762/bjoc.20.192)
Supplement: File 2 — Calculations of viscosity for CFPS with water-soluble solvents in Table 2. [file Beilstein_J_Org_Chem-20-2242-s002.xlsx]

## Sheet: Tabelle1
Additive	DMSO		MeOH
%	viscosity of CFPS system[µPa*s]	%	viscosity of CFPS system[µPa*s]
2	1409.01	2	1411.3
5	1413.86	5	1419.67
10	1422.53	10	1434.41
E_T(30)	kcal/mol	https://pubs.acs.org/doi/pdf/10.1021/cr00032a005?src=getftr	34.5	https://pubs.acs.org/doi/pdf/10.1021/cr00032a005?src=getftr			https://pubchem.ncbi.nlm.nih.gov/compound/887#section=Vapor-Pressure
	density [g/mL]	molecular weight [g/mol]	Viscosity[µPa*s]	mol/mL	98	95	90	% v/v				References:
2%PEG 8000	1.0007		1405.9	2.5e-06	0.00025	0.00025	0.00025	mol	in 100 mL			[1]	Syal, V. K.; Chauhan, A.; Chauhan, S. Ultrasonic Velocity, Viscosity and Density Studies of Poly (Ethylene Glycols)(PEG-8,000, PEG-20,000) in Acetonitrile (AN) and Water (H 2 O) Mixtures at 25 0 C; 2005; Vol. 27
Reference	[1]		[1]									[2]	Institut für Arbeitsschutz der Deutschen Gesetzlichen Unfallversicherung. Eintrag zu Dimethylsulfoxid in der GESTIS-Stoffdatenbank
H2O in 2%	0.9807	[g]	98.3651	[mL]	96.3651	93.3651	88.3651	mL				[3]	Lemmon, E. W.; Bell, I. H.; Huber, M. L.; McLinden, M. O. Thermophysical Properties of Fluid Systems. In NIST Chemistry WebBook, NIST Standard Reference Database Number 69; Linstrom, P. J., Mallard, W. G., Eds.; National Institute of Standards and Technology: Gaithersburg MD, 2023
H2O	0.997	18.0153		0.0553418
H2O in 100 mL					5.33302	5.167	4.89029	mol
CFPS	1.0007		1405.9		5.33327	5.16725	4.89054	mol
DMSO	1.1	78.133	2140	0.0140786	0.0281571	0.0703928	0.140786	mol	in 100 mL
Reference	[2]		[2]
Total					5.36143	5.23764	5.03132	mol
molar fraction CFPS					0.994748	0.98656	0.972018
molar fraction DMSO					0.00525179	0.0134398	0.0279818
MeOH	0.78633	32.0419	543.71	0.0245407	0.0490814	0.122703	0.245407	mol	in 100 mL
Reference	[3]		[3]
Total					5.38235	5.28995	5.13594	mol
molar fraction CFPS					0.990881	0.976804	0.952218
molar fraction DMSO					0.00911894	0.0231956	0.0477822
