# Supplementary material for: Cell-free protein synthesis with technical additives – expanding the parameter space of in vitro gene expression
Source: Beilstein J Org Chem. 2024 Sep 4;20:2242–53. doi: 10.3762/bjoc.20.192 (PMC11403795; doi:10.3762/bjoc.20.192)
Supplement: File 3 — Fractional Yield of average sfGFP production with CFPS. [file Beilstein_J_Org_Chem-20-2242-s003.xlsx]

## Sheet: Amino acid sequence
Input required
Output
amino acid sequence protein			The amino acid sequence of the protein has to be inserted into cell A5. Use paste values.
MGSSHHHHHHSSGLVPRGSHMVSKGEELFTGVVPILVELDGDVNGHKFSVRGEGEGDATNGKLTLKFICTTGKLPVPWPTLVTTLTYGVQCFSRYPDHMKQHDFFKSAMPEGYVQERTISFKDDGTYKTRAEVKFEGDTLVNRIELKGIDFKEDGNILGHKLEYNFNSHNVYITADKQKNGIKANFKIRHNVEDGSVQLADHYQQNTPIGDGPVLLPDNHYLSTQSKLSKDPNEKRDHMVLLEFVTAAGITLGMDELYK
Amino Acid	3-letter Code	1-letter Code	Molecular Weight [g mol-1]	Number of amino acids per protein	Percentage	Moleculare weight of protein [g mol-1]
Alanine	Ala	A	89.1	8	0.030888	29016.7
Arginine	Arg	R	174.2	8	0.030888
Asparagine	Asn	N	132.1	13	0.0501931
Aspartate	Asp	D	133.1	18	0.0694981
Cysteine	Cys	C	121.2	2	0.00772201
Glutamate	Glu	E	147.1	16	0.0617761
Glutamine	Gln	Q	146.2	8	0.030888
Glycine	Gly	G	75.1	25	0.0965251
Histidine	His	H	155.2	16	0.0617761
Isoleucine	Ile	I	131.2	11	0.042471
Leucine	Leu	L	131.2	22	0.0849421
Lysine	Lys	K	146.2	21	0.0810811
Methionine	Met	M	149.2	6	0.023166
Phenylalanine	Phe	F	165.2	12	0.046332
Proline	Pro	P	115.1	11	0.042471
Serine	Ser	S	105.1	15	0.0579151
Threonine	Thr	T	119.1	18	0.0694981
Tryptophan	Trp	W	204.2	1	0.003861
Tyrosine	Tyr	Y	181.2	9	0.034749
Valine	Val	V	117.1	19	0.0733591

## Sheet: Protein concentration
Input required
Output
input:							output:
	Enter concentration of each amino acid			Enter the experimentally achieved protein concentration				theoretical maximum protein concentration				yield on respective amino acid			fractional yield
	Amino Acid	Concentration		µM				Amino Acid	Concentration			Amino Acid	Yield (YP/Ai)		1.14154
	A	1.5		64.86				A	187.5	5.44063		A	125
	R	1.5						R	187.5	5.44063		R	125
	N	1.5		The protein concentration has to be entered in µM. Use cells underneath to convert from mg mL-1.				N	115.385	3.34808		N	76.9231
	D	1.5						D	83.3333	2.41806		D	55.5556
	C	1.5						C	750	21.7625		C	500
	Q	1.5		mg mL-1				Q	93.75	2.72032		Q	62.5
	E	1.5		1.7735				E	187.5	5.44063		E	125
	G	1.5		µM				G	60	1.741		G	40
	H	1.5		61.12				H	93.75	2.72032		H	62.5
	I	1.5						I	136.364	3.95682		I	90.9091
	L	1.25						L	56.8182	1.64868		L	45.4545
	K	1.5						K	71.4286	2.07262		K	47.619
	M	1.5						M	250	7.25417		M	166.667
	F	1.5						F	125	3.62709		F	83.3333
	P	1.5						P	136.364	3.95682		P	90.9091
	S	1.5						S	100	2.90167		S	66.6667
	T	1.5						T	83.3333	2.41806		T	55.5556
	W	1.5						W	1500	43.525		W	1000
	Y	1.5						Y	166.667	4.83612		Y	111.111
	V	1.5						V	78.9474	2.29079		V	52.6316
								Max. conc.	56.8182	1.64868

## Sheet: Calculations
calculation of the theoretical maximum amount of protein for each amino acid						calculation of the actual usage of amino acids in consideration of the limiting factor
	amino acids in CFPS mix		maximum amount protein				used amino acids		remaining amino acids				used amino acids
AS		mol L-1		mol L-1		AS		mol L-1		mol L-1		AS		mol L-1	mmol/mol
A		0.0015		0.0001875		A		0.000454545		0.00104545		A		0.00051888	125
R		0.0015		0.0001875		R		0.000454545		0.00104545		R		0.00051888	125
N		0.0015		0.000115385		N		0.000738636		0.000761364		N		0.00084318	76.9231
D		0.0015		8.33333e-05		D		0.00102273		0.000477273		D		0.00116748	55.5556
C		0.0015		0.00075		C		0.000113636		0.00138636		C		0.00012972	500
Q		0.0015		9.375e-05		Q		0.000909091		0.000590909		Q		0.00103776	62.5
E		0.0015		0.0001875		E		0.000454545		0.00104545		E		0.00051888	125
G		0.0015		6e-05		G		0.00142045		7.95455e-05		G		0.0016215	40
H		0.0015		9.375e-05		H		0.000909091		0.000590909		H		0.00103776	62.5
I		0.0015		0.000136364		I		0.000625		0.000875		I		0.00071346	90.9091
L		0.00125		5.68182e-05		L		0.00125		0		L		0.00142692	45.4545
K		0.0015		7.14286e-05		K		0.00119318		0.000306818		K		0.00136206	47.619
M		0.0015		0.00025		M		0.000340909		0.00115909		M		0.00038916	166.667
F		0.0015		0.000125		F		0.000681818		0.000818182		F		0.00077832	83.3333
P		0.0015		0.000136364		P		0.000625		0.000875		P		0.00071346	90.9091
S		0.0015		0.0001		S		0.000852273		0.000647727		S		0.0009729	66.6667
T		0.0015		8.33333e-05		T		0.00102273		0.000477273		T		0.00116748	55.5556
W		0.0015		0.0015		W		5.68182e-05		0.00144318		W		6.486e-05	1000
Y		0.0015		0.000166667		Y		0.000511364		0.000988636		Y		0.00058374	111.111
V		0.0015		7.89474e-05		V		0.00107955		0.000420455		V		0.00123234	52.6316
limiting factor		0.00125		5.68182e-05
