# Supplementary material for: Cell-free protein synthesis with technical additives – expanding the parameter space of in vitro gene expression
Source: Beilstein J Org Chem. 2024 Sep 4;20:2242–53. doi: 10.3762/bjoc.20.192 (PMC11403795; doi:10.3762/bjoc.20.192)
Supplement: File 4 — Fractional yield of average thscGAS-sfGFP production with CFPS. [file Beilstein_J_Org_Chem-20-2242-s004.xlsx]

## Sheet: Amino acid sequence
Input required
Output
amino acid sequence protein			The amino acid sequence of the protein has to be inserted into cell A5. Use paste values.
MSDSEVNQEAKPEVKPEVKPETHINLKVSDGSSEIFFKIKKTTPLRRLMEAFAKRQGKEMDSLRFLYDGIRIQADQTPEDLDMEDNDIIEAHREQIGGMGASKLRAVLEKLKLSRDDISTAAGMVKGVVDHLLLRLKCDSAFRGVGLLNTGSYYEHVKISAPNEFDVMFKLEVPRIQLEEYSNTRAYYFVKFKRNPKENPLSQFLEGEILSASKMLSKFRKIIKEEINDIKDTDVIMKRKRGGSPAVTLLISEKISVDITLALESKSSWPASTQEGLRIQNWLSAKVRKQLRLKPFYLVPKHAKEGNGFQEETWRLSFSHIEKEILNNHGKSKTCCENKEEKCCRKDCLKLMKYLLEQLKERFKDKKHLDKFSSYHVKTAFFHVCTQNPQDSQWDRKDL…
Amino Acid	3-letter Code	1-letter Code	Molecular Weight [g mol-1]	Number of amino acids per protein	Percentage	Moleculare weight of protein [g mol-1]
Alanine	Ala	A	89.1	27	0.0379747	81427
Arginine	Arg	R	174.2	33	0.0464135
Asparagine	Asn	N	132.1	35	0.0492264
Aspartate	Asp	D	133.1	45	0.0632911
Cysteine	Cys	C	121.2	12	0.0168776
Glutamate	Glu	E	147.1	60	0.0843882
Glutamine	Gln	Q	146.2	25	0.0351617
Glycine	Gly	G	75.1	44	0.0618847
Histidine	His	H	155.2	19	0.0267229
Isoleucine	Ile	I	131.2	38	0.0534459
Leucine	Leu	L	131.2	69	0.0970464
Lysine	Lys	K	146.2	73	0.102672
Methionine	Met	M	149.2	14	0.0196906
Phenylalanine	Phe	F	165.2	39	0.0548523
Proline	Pro	P	115.1	26	0.0365682
Serine	Ser	S	105.1	50	0.0703235
Threonine	Thr	T	119.1	36	0.0506329
Tryptophan	Trp	W	204.2	5	0.00703235
Tyrosine	Tyr	Y	181.2	21	0.0295359
Valine	Val	V	117.1	40	0.0562588

## Sheet: Protein concentration
Input required
Output
input:							output:
	Enter concentration of each amino acid			Enter the experimentally achieved protein concentration				theoretical maximum protein concentration				yield on respective amino acid			fractional yield
	Amino Acid	Concentration		µM				Amino Acid	Concentration			Amino Acid	Yield (YP/Ai)		0.10488
	A	1.5		1.9				A	55.5556	4.52372		A	37.037
	R	1.5						R	45.4545	3.70123		R	30.303
	N	1.5		The protein concentration has to be entered in µM. Use cells underneath to convert from mg mL-1.				N	42.8571	3.48973		N	28.5714
	D	1.5						D	33.3333	2.71423		D	22.2222
	C	1.5						C	125	10.1784		C	83.3333
	Q	1.5		mg mL-1				Q	25	2.03568		Q	16.6667
	E	1.5		0.1343				E	60	4.88562		E	40
	G	1.5		µM				G	34.0909	2.77592		G	22.7273
	H	1.5		1.64933				H	78.9474	6.42845		H	52.6316
	I	1.5						I	39.4737	3.21423		I	26.3158
	L	1.25						L	18.1159	1.47513		L	14.4928
	K	1.5						K	20.5479	1.67316		K	13.6986
	M	1.5						M	107.143	8.72433		M	71.4286
	F	1.5						F	38.4615	3.13181		F	25.641
	P	1.5						P	57.6923	4.69771		P	38.4615
	S	1.5						S	30	2.44281		S	20
	T	1.5						T	41.6667	3.39279		T	27.7778
	W	1.5						W	300	24.4281		W	200
	Y	1.5						Y	71.4286	5.81622		Y	47.619
	V	1.5						V	37.5	3.05351		V	25
								Max. conc.	18.1159	1.47513

## Sheet: Calculations
calculation of the theoretical maximum amount of protein for each amino acid						calculation of the actual usage of amino acids in consideration of the limiting factor
	amino acids in CFPS mix		maximum amount protein				used amino acids		remaining amino acids				used amino acids
AS		mol L-1		mol L-1		AS		mol L-1		mol L-1		AS		mol L-1	mmol/mol
A		0.0015		5.55556e-05		A		0.00048913		0.00101087		A		5.13e-05	37.037
R		0.0015		4.54545e-05		R		0.000597826		0.000902174		R		6.27e-05	30.303
N		0.0015		4.28571e-05		N		0.000634058		0.000865942		N		6.65e-05	28.5714
D		0.0015		3.33333e-05		D		0.000815217		0.000684783		D		8.55e-05	22.2222
C		0.0015		0.000125		C		0.000217391		0.00128261		C		2.28e-05	83.3333
Q		0.0015		2.5e-05		Q		0.00108696		0.000413043		Q		0.000114	16.6667
E		0.0015		6e-05		E		0.000452899		0.0010471		E		4.75e-05	40
G		0.0015		3.40909e-05		G		0.000797101		0.000702899		G		8.36e-05	22.7273
H		0.0015		7.89474e-05		H		0.000344203		0.0011558		H		3.61e-05	52.6316
I		0.0015		3.94737e-05		I		0.000688406		0.000811594		I		7.22e-05	26.3158
L		0.00125		1.81159e-05		L		0.00125		0		L		0.0001311	14.4928
K		0.0015		2.05479e-05		K		0.00132246		0.000177536		K		0.0001387	13.6986
M		0.0015		0.000107143		M		0.000253623		0.00124638		M		2.66e-05	71.4286
F		0.0015		3.84615e-05		F		0.000706522		0.000793478		F		7.41e-05	25.641
P		0.0015		5.76923e-05		P		0.000471014		0.00102899		P		4.94e-05	38.4615
S		0.0015		3e-05		S		0.000905797		0.000594203		S		9.5e-05	20
T		0.0015		4.16667e-05		T		0.000652174		0.000847826		T		6.84e-05	27.7778
W		0.0015		0.0003		W		9.05797e-05		0.00140942		W		9.5e-06	200
Y		0.0015		7.14286e-05		Y		0.000380435		0.00111957		Y		3.99e-05	47.619
V		0.0015		3.75e-05		V		0.000724638		0.000775362		V		7.6e-05	25
limiting factor		0.00125		1.81159e-05
